# Supplementary material
Source: PubMed Central journal article supplement (PMC4063126)

## Supplementary Information

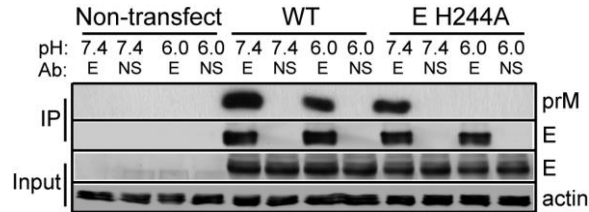

**Supplementary Figure 1. The M region of DENV prM protein binds E protein at neutral pH.** 293T cells were transfected with plasmids encoding WT or mutant prME. Two days post-transfection, the cells were lysed in buffers at the indicated pH. Aliquots of the lysates were immunoprecipitated at the indicated pH with anti-E mAb 4E11 (E) or a non-specific mAb (NS). The eluted proteins were analyzed by SDS-PAGE and western blot to detect prM or E. Expression levels in the lysates were evaluated by western blot (input). Data are a representative example of two independent experiments. Full scans of the blots are in Supplementary Fig. 4.

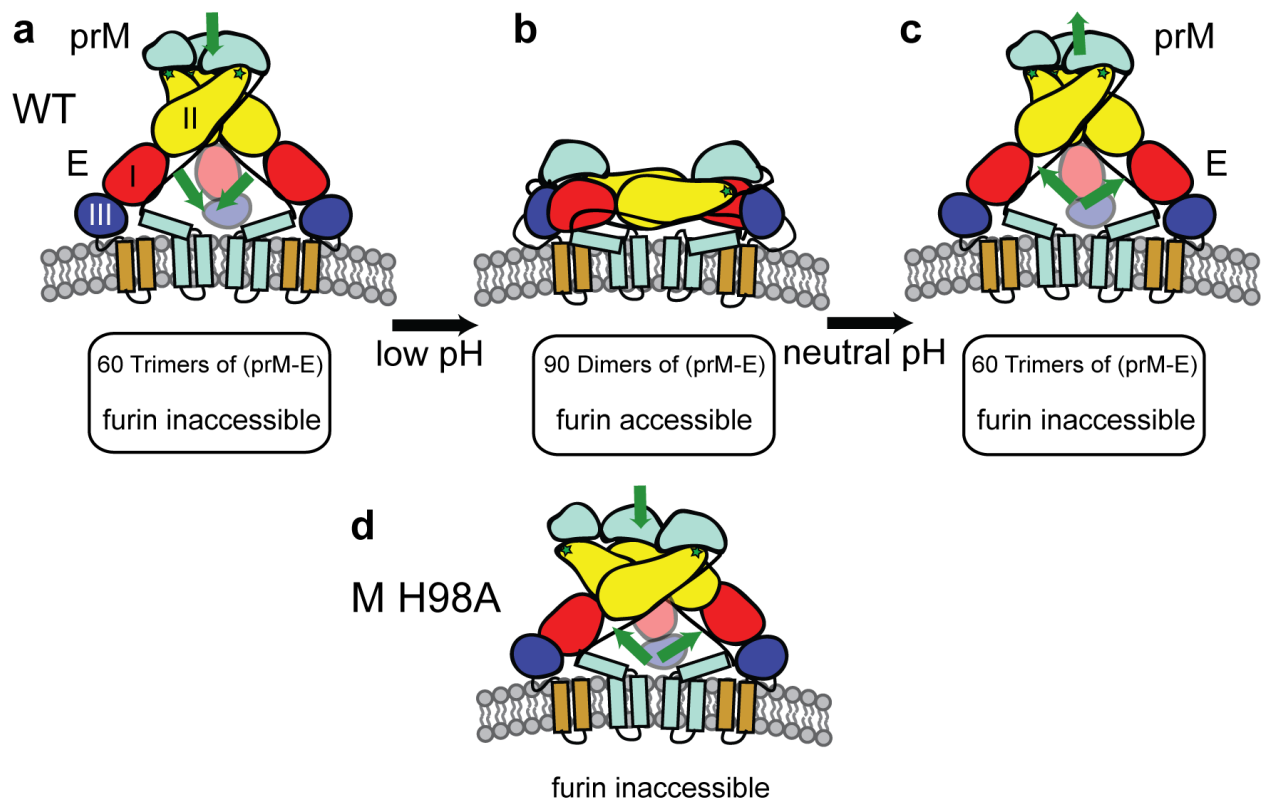

**Supplementary Figure 2. Model for the reversible pH-triggered transition of immature DENV particles.** DI, DII and DIII of E protein are colored red, yellow and blue, and the fusion loop at the DII tip is indicated by a star. The prM and E TM domains are displayed in cyan and brown, respectively. The pr region is shown in cyan, and the black line indicates the N-terminal region of M. a. The immature trimer of prM-E is shown. The interactions between prM and E triggered by low pH are highlighted by the green arrows, which indicate pr-E binding and M-E repulsion. b. Low pH conformation of the immature virus. c. Return to the immature trimer conformation. The interactions between prM and E triggered by neutral pH are highlighted by the green arrows, which indicate pr-E repulsion and M-E binding. d. Proposed intermediate conformation of prM H98A virus at low pH. The interactions between prM and E triggered by low pH are highlighted by the green arrows, which indicate pr-E binding and M-E binding. Modified from Trends in Microbiology, vol. 17 (11), C. Sánchez-San Martín, C. Y. Liu, M. Kielian, Dealing with low pH: entry and exit of alphaviruses and flaviviruses, p. 514-521, Copyright (2009), with permission from Elsevier.

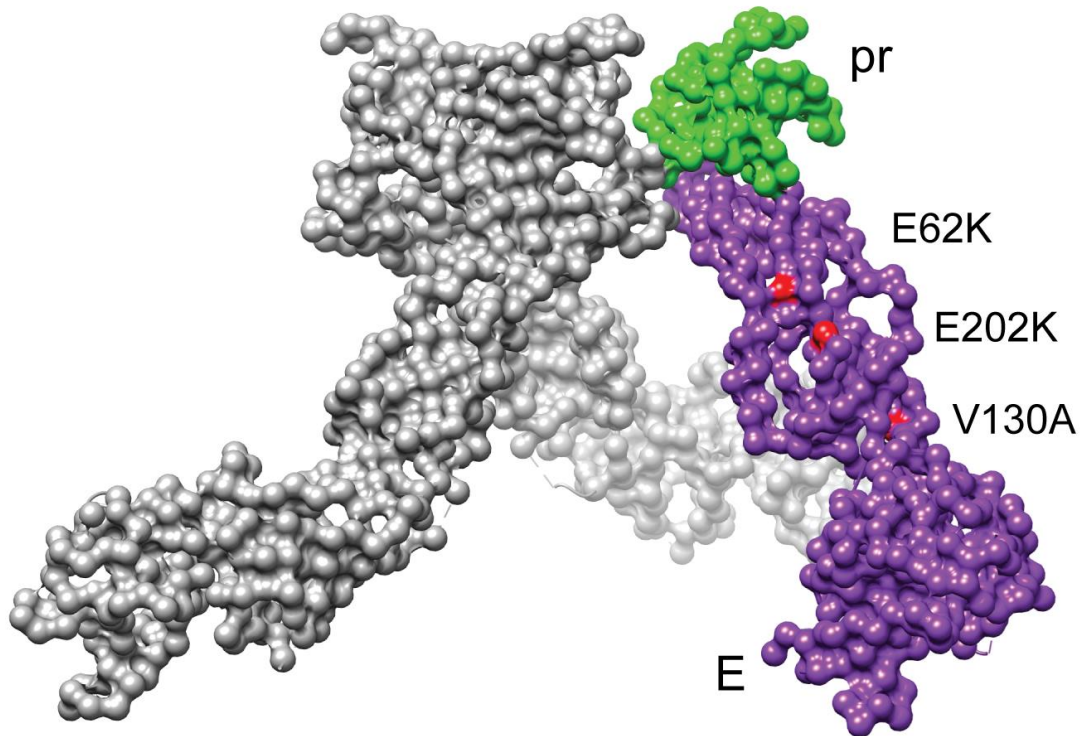

**Supplementary Figure 3. Locations of the E revertant mutations in the immature prM-E trimer structure.** Surface view of the immature trimer of pr-E is shown, as derived by the fit of the prM-E heterodimer structure into the cryoEM reconstruction of the dengue immature virus at neutral pH (PDB accession number 3C6D). One pr peptide is indicated in green and one E protein in purple, with the other proteins in the trimer shown in dark or light grey. The positions of the E protein mutations at residues 62, 130 and 202 are indicated. Figure prepared using PyMOL (The PyMOL Molecular Graphics System, Version 1.5.0.4, Schrödinger, LLC).

**Supplementary Figure 4. Full scans of the western blots and phosphorimages used**

**in this study.** Panels are labeled to correspond with the number of the original figure.

**Figure 1**

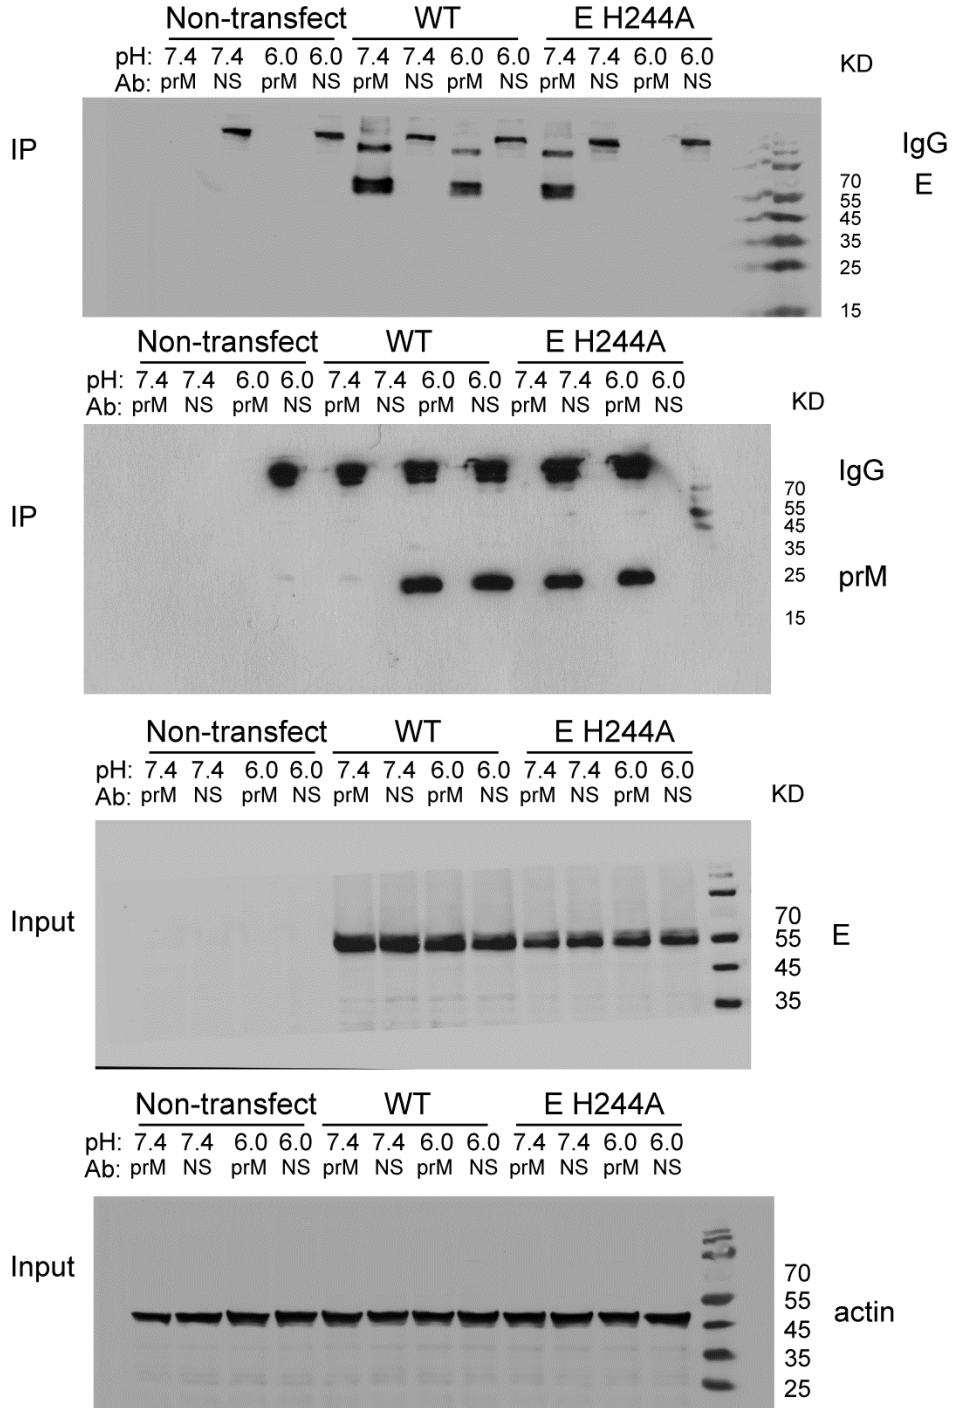

Supplementary Figure 4 Continued

Figure 2

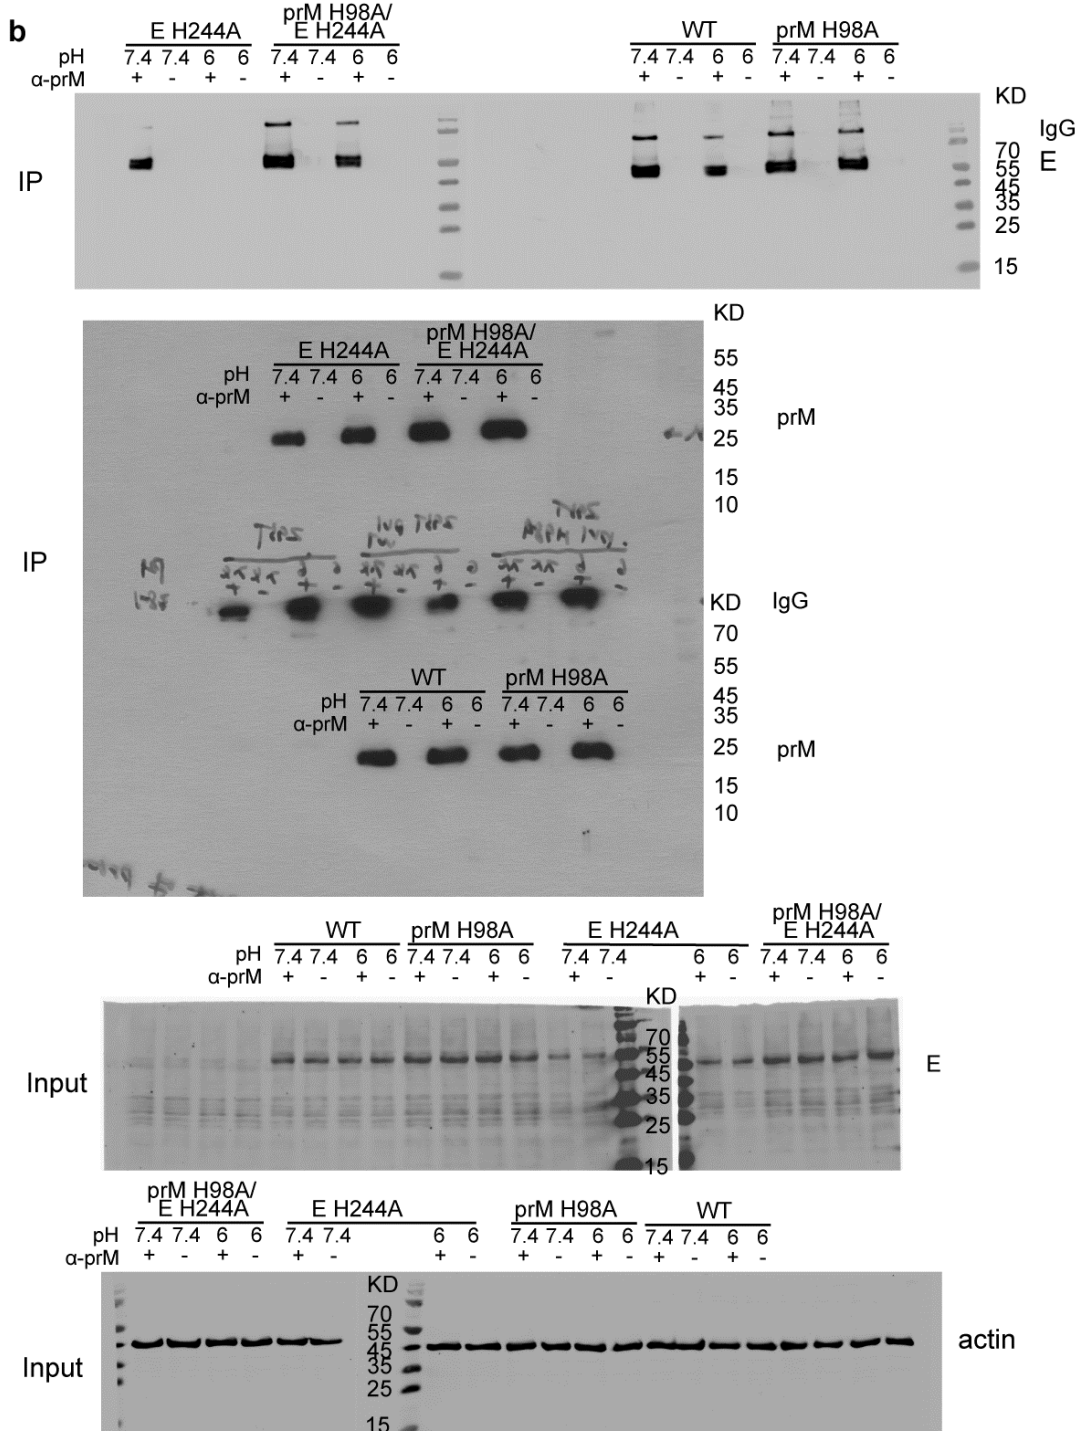

Supplementary Figure 4 Continued

Figure 3

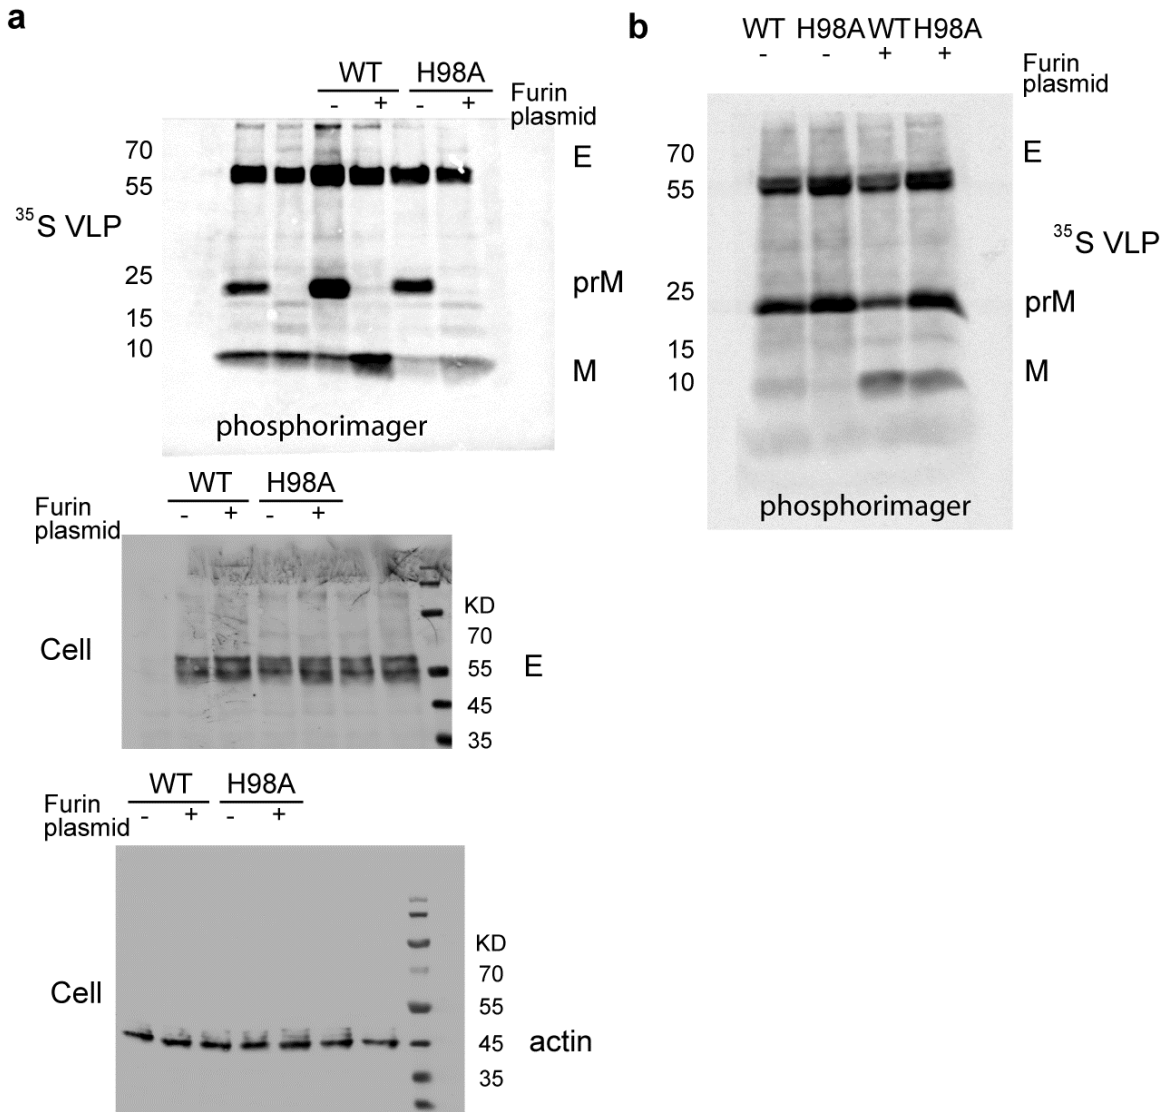

Supplementary Figure 4 Continued

Figure 4

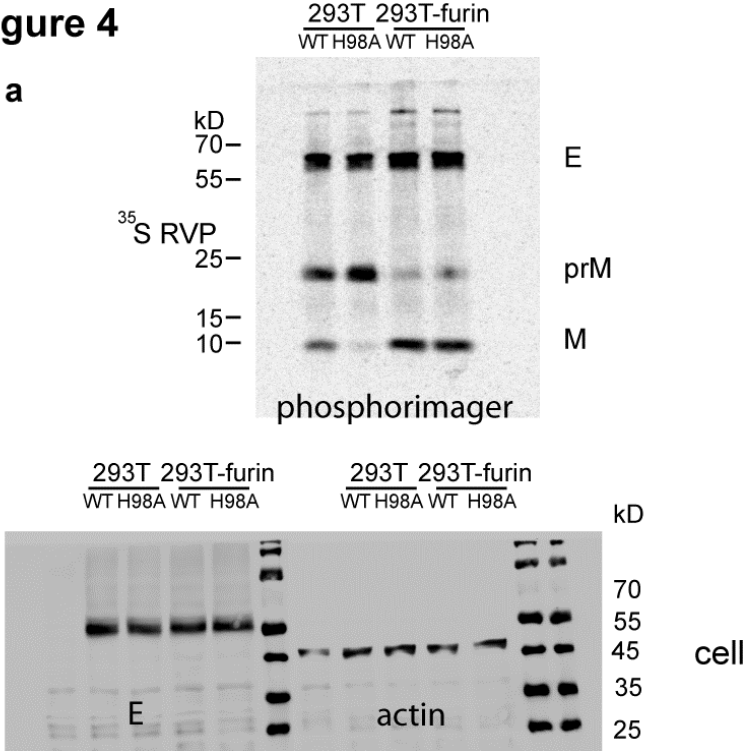

Supplementary Figure 4 Continued

Figure 5

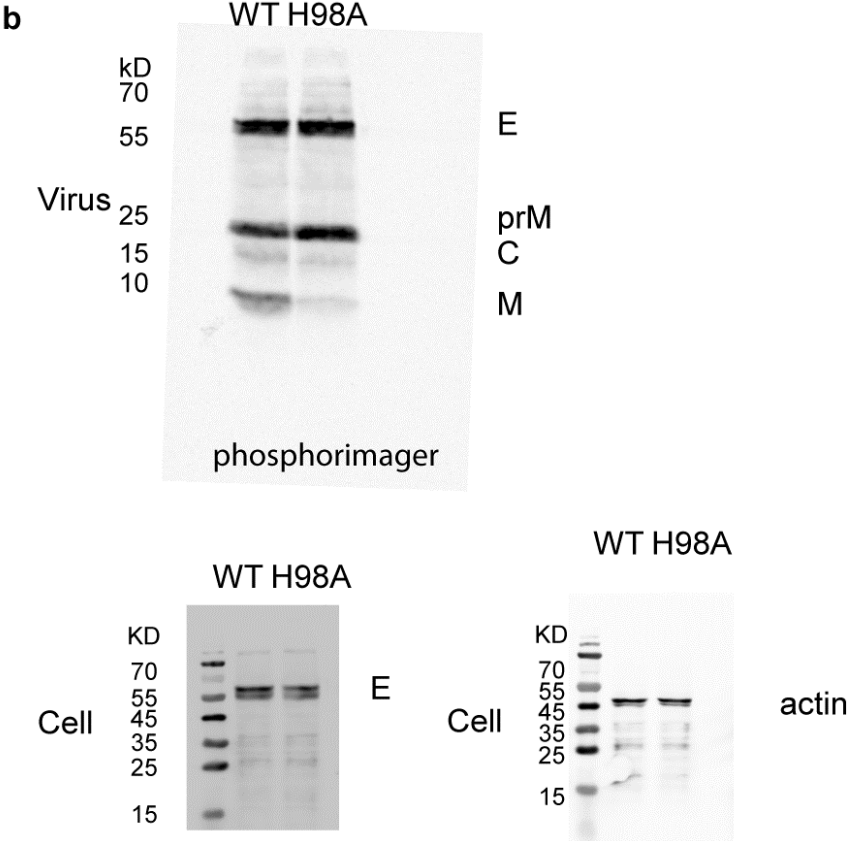



Supplementary Figure 4 Continued

**Figure 6**

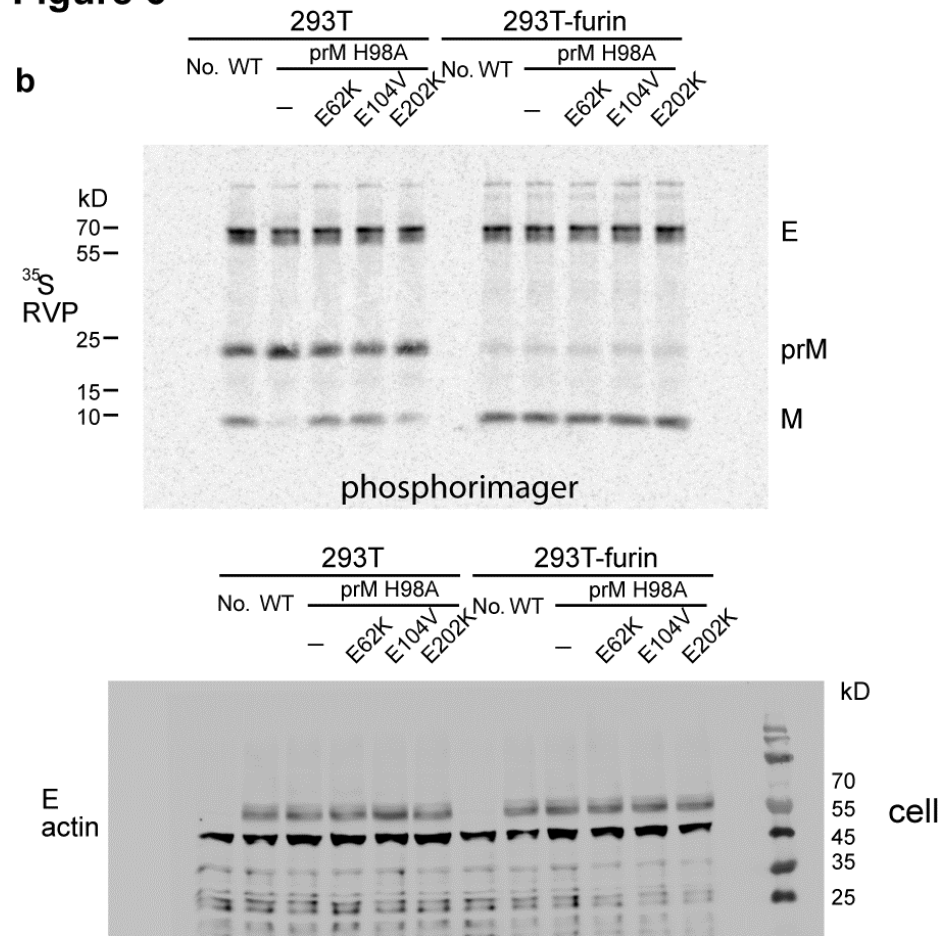

Supplementary Figure 4 Continued

Supplementary Figure 1

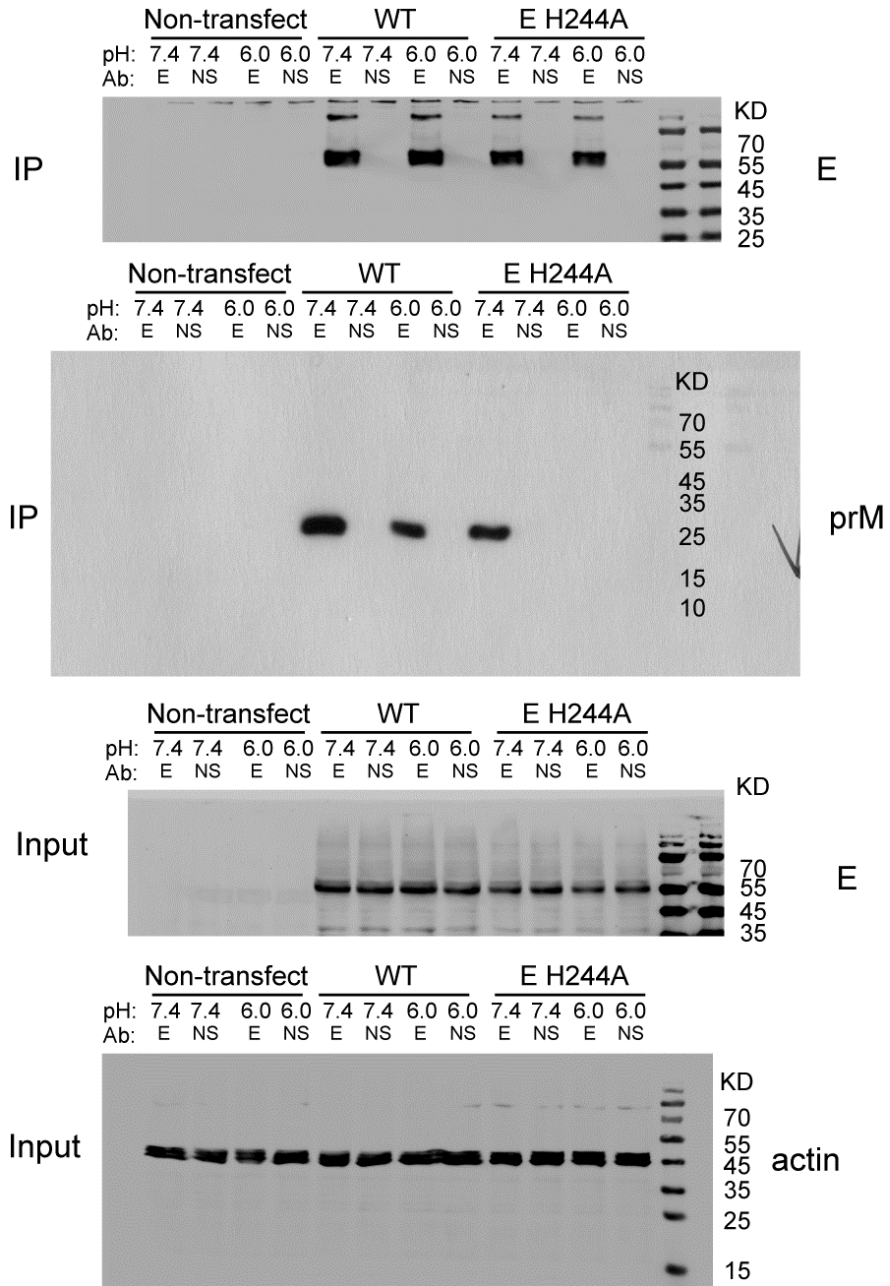

Supplement: NIHMS586213-supplement-1.pdf [file NIHMS586213-supplement-1.pdf]
